# Supplementary material for: Unlocking the Power of Late-Evening Snacks: Practical Ready-to-Prescribe Chart Menu for Patients with Cirrhosis
Source: MDPI journal article supplement (doi:10.3390/nu15153471), 2023-08-05
Supplement: s1 [file s1]

## SANDWICHES

|                                                                                                                                                                                         |  |               |              |                                                                                     |          |
|-----------------------------------------------------------------------------------------------------------------------------------------------------------------------------------------|--|---------------|--------------|-------------------------------------------------------------------------------------|----------|
| <b>SNACK N.1</b><br> <p>White Bread (50 g/1.7 oz)<br/>Ham (30 g/1.4 oz)<br/>Emmental (20 g/0.7 oz)</p> |  |               | <b>g</b>     | <b>Kcal</b>                                                                         | <b>%</b> |
|                                                                                                                                                                                         |  | Protein       | <b>16.40</b> | 65.60                                                                               | 25.40    |
|                                                                                                                                                                                         |  | Fat           | 7.50         | 67.90                                                                               | 26.20    |
|                                                                                                                                                                                         |  | Carbohydrates | <b>33.40</b> | 125.10                                                                              | 48.40    |
|                                                                                                                                                                                         |  | Total Energy  |              | <b>258.60</b>                                                                       | 100.00   |
|                                                                                                                                                                                         |  | Sodium (mg)   | 640          |  |          |

  

|                                                                                                                                                                      |  |               |              |                                                                                     |          |
|----------------------------------------------------------------------------------------------------------------------------------------------------------------------|--|---------------|--------------|-------------------------------------------------------------------------------------|----------|
| <b>SNACK N.2</b><br> <p>White Bread (50 g/1.7 oz)<br/>Canned Tuna (56 g/1.9 oz)</p> |  |               | <b>g</b>     | <b>Kcal</b>                                                                         | <b>%</b> |
|                                                                                                                                                                      |  | Protein       | <b>17.90</b> | 71.60                                                                               | 29.30    |
|                                                                                                                                                                      |  | Fat           | 5.70         | 50.90                                                                               | 20.90    |
|                                                                                                                                                                      |  | Carbohydrates | <b>32.40</b> | 121.30                                                                              | 49.80    |
|                                                                                                                                                                      |  | Total Energy  |              | <b>243.80</b>                                                                       | 100.00   |
|                                                                                                                                                                      |  | Sodium (mg)   | 510          |  |          |

  

|                                                                                                                                                                                                                                               |  |               |              |                                                                                                                                                                           |          |
|-----------------------------------------------------------------------------------------------------------------------------------------------------------------------------------------------------------------------------------------------|--|---------------|--------------|---------------------------------------------------------------------------------------------------------------------------------------------------------------------------|----------|
| <b>SNACK N.3</b><br> <p>White Bread (50 g/1.7 oz)<br/>Mozzarella Cheese* (40 g/1.4 oz)<br/>Tomato** (20 g/0.7 oz)<br/><i>*1/3 of cheese / **1 slice</i></p> |  |               | <b>g</b>     | <b>Kcal</b>                                                                                                                                                               | <b>%</b> |
|                                                                                                                                                                                                                                               |  | Protein       | <b>11.80</b> | 47.10                                                                                                                                                                     | 19.40    |
|                                                                                                                                                                                                                                               |  | Fat           | 7.90         | 71.20                                                                                                                                                                     | 29.40    |
|                                                                                                                                                                                                                                               |  | Carbohydrates | <b>33.20</b> | 124.50                                                                                                                                                                    | 51.20    |
|                                                                                                                                                                                                                                               |  | Total Energy  |              | <b>242.60</b>                                                                                                                                                             | 100.00   |
|                                                                                                                                                                                                                                               |  | Sodium (mg)   | 413          |   |          |

  

|                                                                                                                                                                                                             |  |               |              |                                                                                                                                                                             |          |
|-------------------------------------------------------------------------------------------------------------------------------------------------------------------------------------------------------------|--|---------------|--------------|-----------------------------------------------------------------------------------------------------------------------------------------------------------------------------|----------|
| <b>SNACK N.4</b><br> <p>White Bread (50 g/1.7 oz)<br/>1 Boiled Egg (60 g/2.1 oz)<br/>1 teaspoon of Mayo (5 g/0.1 oz)</p> |  |               | <b>g</b>     | <b>Kcal</b>                                                                                                                                                                 | <b>%</b> |
|                                                                                                                                                                                                             |  | Protein       | <b>11.70</b> | 46.80                                                                                                                                                                       | 18.90    |
|                                                                                                                                                                                                             |  | Fat           | 8.80         | 79.40                                                                                                                                                                       | 32.00    |
|                                                                                                                                                                                                             |  | Carbohydrates | <b>32.50</b> | 121.70                                                                                                                                                                      | 49.10    |
|                                                                                                                                                                                                             |  | Total Energy  |              | <b>247.90</b>                                                                                                                                                               | 100.00   |
|                                                                                                                                                                                                             |  | Sodium (mg)   | 1085         |   |          |

  

|                                                                                                                                                                          |  |               |              |                                                                                       |          |
|--------------------------------------------------------------------------------------------------------------------------------------------------------------------------|--|---------------|--------------|---------------------------------------------------------------------------------------|----------|
| <b>SNACK N.5</b><br> <p>White Bread (50 g/1.7 oz)<br/>Smoked Salmon (40 g/1.4 oz)</p> |  |               | <b>g</b>     | <b>Kcal</b>                                                                           | <b>%</b> |
|                                                                                                                                                                          |  | Protein       | <b>14.40</b> | 57.70                                                                                 | 25.30    |
|                                                                                                                                                                          |  | Fat           | 5.40         | 48.60                                                                                 | 21.30    |
|                                                                                                                                                                          |  | Carbohydrates | <b>32.50</b> | 121.70                                                                                | 53.40    |
|                                                                                                                                                                          |  | Total Energy  |              | <b>228.00</b>                                                                         | 100.00   |
|                                                                                                                                                                          |  | Sodium (mg)   | 1085         |  |          |

  

|                                                                                                                                                                                       |  |               |              |                                                                                       |          |
|---------------------------------------------------------------------------------------------------------------------------------------------------------------------------------------|--|---------------|--------------|---------------------------------------------------------------------------------------|----------|
| <b>SNACK N.6</b><br> <p>White Bread (50 g/1.7 oz)<br/>5 slices of Roasted Turkey (50 g/1.7 oz)</p> |  |               | <b>g</b>     | <b>Kcal</b>                                                                           | <b>%</b> |
|                                                                                                                                                                                       |  | Protein       | <b>13.50</b> | 54.00                                                                                 | 24.30    |
|                                                                                                                                                                                       |  | Fat           | 4.40         | 39.50                                                                                 | 17.80    |
|                                                                                                                                                                                       |  | Carbohydrates | <b>34.30</b> | 128.50                                                                                | 57.90    |
|                                                                                                                                                                                       |  | Total Energy  |              | <b>222.00</b>                                                                         | 100.00   |
|                                                                                                                                                                                       |  | Sodium (mg)   | 730          |  |          |

| SNACK N.7                                                                                                                                                           |               | g            | Kcal                                                                                | %      |
|---------------------------------------------------------------------------------------------------------------------------------------------------------------------|---------------|--------------|-------------------------------------------------------------------------------------|--------|
|  <p>Whole Bread (60 g/2.1 oz)<br/>Ham (30 g/1.4 oz)<br/>Emmental (20 g/0.7 oz)</p> | Protein       | <b>16.80</b> | 67.20                                                                               | 24.50  |
|                                                                                                                                                                     | Fat           | 8.20         | 73.80                                                                               | 26.90  |
|                                                                                                                                                                     | Carbohydrates | <b>33.30</b> | 133.20                                                                              | 48.60  |
|                                                                                                                                                                     | Total Energy  |              | <b>274.20</b>                                                                       | 100.00 |
|                                                                                                                                                                     | Sodium (mg)   | 640          |  |        |

| SNACK N.8                                                                                                                                        |               | g            | Kcal                                                                                                                                                                    | %      |
|--------------------------------------------------------------------------------------------------------------------------------------------------|---------------|--------------|-------------------------------------------------------------------------------------------------------------------------------------------------------------------------|--------|
|  <p>Whole Bread (60 g/2.1 oz)<br/>Canned Tuna (56 g/1.9 oz)</p> | Protein       | <b>18.30</b> | 73.20                                                                                                                                                                   | 28.10  |
|                                                                                                                                                  | Fat           | 6.40         | 57.60                                                                                                                                                                   | 22.10  |
|                                                                                                                                                  | Carbohydrates | <b>32.30</b> | 129.20                                                                                                                                                                  | 49.80  |
|                                                                                                                                                  | Total Energy  |              | <b>260.00</b>                                                                                                                                                           | 100.00 |
|                                                                                                                                                  | Sodium (mg)   | 506          |   |        |

| SNACK N.9                                                                                                                                                                                                               |               | g            | Kcal                                                                                                                                                                    | %     |
|-------------------------------------------------------------------------------------------------------------------------------------------------------------------------------------------------------------------------|---------------|--------------|-------------------------------------------------------------------------------------------------------------------------------------------------------------------------|-------|
| 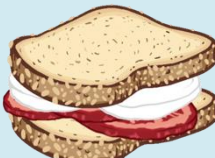 <p>Whole Bread (60 g/2.1 oz)<br/>Mozzarella Cheese* (40 g/1.4 oz)<br/>Tomato** (20 g/0.7 oz)<br/><i>*1/3 of cheese/** 1 slice</i></p> | Protein       | <b>12.20</b> | 48.8                                                                                                                                                                    | 18.90 |
|                                                                                                                                                                                                                         | Fat           | 8.60         | 77.40                                                                                                                                                                   | 29.90 |
|                                                                                                                                                                                                                         | Carbohydrates | <b>33.10</b> | 132.4                                                                                                                                                                   | 51.20 |
|                                                                                                                                                                                                                         | Total Energy  |              | <b>258.6</b>                                                                                                                                                            | 100   |
|                                                                                                                                                                                                                         | Sodium (mg)   | 410          |   |       |

| SNACK N.10                                                                                                                                                                                               |               | g            | Kcal                                                                                                                                                                                                                                                              | %      |
|----------------------------------------------------------------------------------------------------------------------------------------------------------------------------------------------------------|---------------|--------------|-------------------------------------------------------------------------------------------------------------------------------------------------------------------------------------------------------------------------------------------------------------------|--------|
|  <p>Whole Bread (60 g/2.1 oz)<br/>1 Boiled Egg (60 g/2.1 oz)<br/>Mayonnaise* (5 g/0.1 oz)<br/><i>*1 tea spoon</i></p> | Protein       | <b>12.10</b> | 48.40                                                                                                                                                                                                                                                             | 18.40  |
|                                                                                                                                                                                                          | Fat           | 9.50         | 85.50                                                                                                                                                                                                                                                             | 32.40  |
|                                                                                                                                                                                                          | Carbohydrates | <b>32.40</b> | 129.60                                                                                                                                                                                                                                                            | 49.20  |
|                                                                                                                                                                                                          | Total Energy  |              | <b>263.50</b>                                                                                                                                                                                                                                                     | 100.00 |
|                                                                                                                                                                                                          | Sodium (mg)   | 434          |    |        |

| SNACK N.11                                                                                                                                           |               | g            | Kcal                                                                                                                                                                        | %      |
|------------------------------------------------------------------------------------------------------------------------------------------------------|---------------|--------------|-----------------------------------------------------------------------------------------------------------------------------------------------------------------------------|--------|
|  <p>Whole Bread (60 g/2.1 oz)<br/>Smoked Salmon (40 g/1.4 oz)</p> | Protein       | <b>14.80</b> | 59.20                                                                                                                                                                       | 24.30  |
|                                                                                                                                                      | Fat           | 6.10         | 54.90                                                                                                                                                                       | 22.50  |
|                                                                                                                                                      | Carbohydrates | <b>32.40</b> | 129.60                                                                                                                                                                      | 53.20  |
|                                                                                                                                                      | Total Energy  |              | <b>243.70</b>                                                                                                                                                               | 100.00 |
|                                                                                                                                                      | Sodium (mg)   | 1082         |   |        |

| SNACK N.12                                                                                                                                                                  |               | g            | Kcal                                                                                                                                                                        | %      |
|-----------------------------------------------------------------------------------------------------------------------------------------------------------------------------|---------------|--------------|-----------------------------------------------------------------------------------------------------------------------------------------------------------------------------|--------|
|  <p>Whole Bread (60 g/2.1 oz)<br/>Roasted Turkey* (50 g/1.7 oz)<br/><i>*5 slices</i></p> | Protein       | <b>13.90</b> | 55.60                                                                                                                                                                       | 23.20  |
|                                                                                                                                                                             | Fat           | 5.20         | 46.80                                                                                                                                                                       | 19.50  |
|                                                                                                                                                                             | Carbohydrates | <b>34.20</b> | 136.80                                                                                                                                                                      | 57.30  |
|                                                                                                                                                                             | Total Energy  |              | <b>239.20</b>                                                                                                                                                               | 100.00 |
|                                                                                                                                                                             | Sodium (mg)   | 730          |   |        |

## RICE POKE'

|                                                                                     |                                                                                                                                   |               |              |                                                                                                                                                                                                                                                                                                                                                         |          |
|-------------------------------------------------------------------------------------|-----------------------------------------------------------------------------------------------------------------------------------|---------------|--------------|---------------------------------------------------------------------------------------------------------------------------------------------------------------------------------------------------------------------------------------------------------------------------------------------------------------------------------------------------------|----------|
|    | <b>SNACK N.13</b><br><br>White rice (40 g/1.4 oz)<br>Tofu (Nigari) (70 g/2.5 oz)                                                  |               | <b>g</b>     | <b>Kcal</b>                                                                                                                                                                                                                                                                                                                                             | <b>%</b> |
|                                                                                     |                                                                                                                                   | Protein       | <b>11.60</b> | 46.50                                                                                                                                                                                                                                                                                                                                                   | 18.30    |
|                                                                                     |                                                                                                                                   | Fat           | 7.20         | 65.20                                                                                                                                                                                                                                                                                                                                                   | 25.60    |
|                                                                                     |                                                                                                                                   | Carbohydrates | <b>38.10</b> | 142.90                                                                                                                                                                                                                                                                                                                                                  | 56.10    |
|                                                                                     |                                                                                                                                   | Total Energy  |              | <b>254.60</b>                                                                                                                                                                                                                                                                                                                                           | 100.00   |
|                                                                                     |                                                                                                                                   | Sodium (mg)   | 10           |                                                                                                |          |
|    | <b>SNACK N.14</b><br><br>White rice (40 g/1.4 oz)<br>Beans <b>or</b> Chickpeas <b>or</b> Lentils<br>(200g/7.1 oz, Cooked Legumes) |               | <b>g</b>     | <b>Kcal</b>                                                                                                                                                                                                                                                                                                                                             | <b>%</b> |
|                                                                                     |                                                                                                                                   | Protein       | <b>11.70</b> | 46.90                                                                                                                                                                                                                                                                                                                                                   | 18.40    |
|                                                                                     |                                                                                                                                   | Fat           | 1.80         | 15.90                                                                                                                                                                                                                                                                                                                                                   | 6.30     |
|                                                                                     |                                                                                                                                   | Carbohydrates | <b>51.20</b> | 191.90                                                                                                                                                                                                                                                                                                                                                  | 75.30    |
|                                                                                     |                                                                                                                                   | Total Energy  |              | <b>254.70</b>                                                                                                                                                                                                                                                                                                                                           | 100.00   |
|                                                                                     |                                                                                                                                   | Sodium (mg)   | 695          |                                                                                                |          |
|   | <b>SNACK N.15</b><br><br>White rice (40 g/1.4 oz)<br>Edamame (90 g/3.2 oz)                                                        |               | <b>g</b>     | <b>Kcal</b>                                                                                                                                                                                                                                                                                                                                             | <b>%</b> |
|                                                                                     |                                                                                                                                   | Protein       | <b>12.70</b> | 50.80                                                                                                                                                                                                                                                                                                                                                   | 19.60    |
|                                                                                     |                                                                                                                                   | Fat           | 4.70         | 42.70                                                                                                                                                                                                                                                                                                                                                   | 16.50    |
|                                                                                     |                                                                                                                                   | Carbohydrates | <b>44.00</b> | 165.10                                                                                                                                                                                                                                                                                                                                                  | 63.90    |
|                                                                                     |                                                                                                                                   | Total Energy  |              | <b>258.60</b>                                                                                                                                                                                                                                                                                                                                           | 100.00   |
|                                                                                     |                                                                                                                                   | Sodium (mg)   | 10           |     |          |
|  | <b>SNACK N.16</b><br><br>White rice (40 g/1.4 oz)<br>Smoked Salmon (50 g/1.8 oz)                                                  |               | <b>g</b>     | <b>Kcal</b>                                                                                                                                                                                                                                                                                                                                             | <b>%</b> |
|                                                                                     |                                                                                                                                   | Protein       | <b>15.50</b> | 62.00                                                                                                                                                                                                                                                                                                                                                   | 28.70    |
|                                                                                     |                                                                                                                                   | Fat           | 2.50         | 22.40                                                                                                                                                                                                                                                                                                                                                   | 10.40    |
|                                                                                     |                                                                                                                                   | Carbohydrates | <b>35.00</b> | 131.40                                                                                                                                                                                                                                                                                                                                                  | 60.90    |
|                                                                                     |                                                                                                                                   | Total Energy  |              | <b>215.80</b>                                                                                                                                                                                                                                                                                                                                           | 100.00   |
|                                                                                     |                                                                                                                                   | Sodium (mg)   | 940          |                                                                                                                                                                               |          |
|  | <b>SNACK N.17</b><br><br>White rice (40 g/1.4 oz)<br>Raw Tuna (50 g/1.8 oz)                                                       |               | <b>g</b>     | <b>Kcal</b>                                                                                                                                                                                                                                                                                                                                             | <b>%</b> |
|                                                                                     |                                                                                                                                   | Protein       | <b>13.60</b> | 54.20                                                                                                                                                                                                                                                                                                                                                   | 24.20    |
|                                                                                     |                                                                                                                                   | Fat           | 4.30         | 38.60                                                                                                                                                                                                                                                                                                                                                   | 17.20    |
|                                                                                     |                                                                                                                                   | Carbohydrates | <b>35.10</b> | 131.60                                                                                                                                                                                                                                                                                                                                                  | 58.60    |
|                                                                                     |                                                                                                                                   | Total Energy  |              | <b>224.40</b>                                                                                                                                                                                                                                                                                                                                           | 100.00   |
|                                                                                     |                                                                                                                                   | Sodium (mg)   | 25           |                                                                                          |          |
|  | <b>SNACK N.18</b><br><br>White rice (40 g/1.4 oz)<br>Raw Salmon (50 g/1.8 oz)                                                     |               | <b>g</b>     | <b>Kcal</b>                                                                                                                                                                                                                                                                                                                                             | <b>%</b> |
|                                                                                     |                                                                                                                                   | Protein       | <b>12.00</b> | 48.00                                                                                                                                                                                                                                                                                                                                                   | 20.20    |
|                                                                                     |                                                                                                                                   | Fat           | 6.20         | 56.20                                                                                                                                                                                                                                                                                                                                                   | 23.70    |
|                                                                                     |                                                                                                                                   | Carbohydrates | <b>35.50</b> | 133.30                                                                                                                                                                                                                                                                                                                                                  | 56.10    |
|                                                                                     |                                                                                                                                   | Total Energy  |              | <b>237.50</b>                                                                                                                                                                                                                                                                                                                                           | 100.00   |
|                                                                                     |                                                                                                                                   | Sodium (mg)   | 52           |                                                                                          |          |

|                                                                                   |                                                         |              |                                                                                                                                                                                                                                                                                                                                                                                                                                     |          |
|-----------------------------------------------------------------------------------|---------------------------------------------------------|--------------|-------------------------------------------------------------------------------------------------------------------------------------------------------------------------------------------------------------------------------------------------------------------------------------------------------------------------------------------------------------------------------------------------------------------------------------|----------|
|  | <b>SNACK N.19</b>                                       |              |                                                                                                                                                                                                                                                                                                                                                                                                                                     |          |
|                                                                                   | Whole Rice (40 g/1.4 oz)<br>Tofu (Nigari) (70 g/2.5 oz) |              |                                                                                                                                                                                                                                                                                                                                                                                                                                     |          |
|                                                                                   |                                                         | <b>g</b>     | <b>Kcal</b>                                                                                                                                                                                                                                                                                                                                                                                                                         | <b>%</b> |
|                                                                                   | Protein                                                 | <b>11.50</b> | 46.00                                                                                                                                                                                                                                                                                                                                                                                                                               | 17.70    |
|                                                                                   | Fat                                                     | 8.10         | 72.90                                                                                                                                                                                                                                                                                                                                                                                                                               | 27.80    |
|                                                                                   | Carbohydrates                                           | <b>35.60</b> | 142.40                                                                                                                                                                                                                                                                                                                                                                                                                              | 54.50    |
|                                                                                   | Total Energy                                            |              | <b>261.30</b>                                                                                                                                                                                                                                                                                                                                                                                                                       | 100.00   |
|                                                                                   | Sodium (mg)                                             | 10           |      |          |

|                                                                                   |                                                                                                          |              |                                                                                                                                                                                                                                                                                                                                                 |          |
|-----------------------------------------------------------------------------------|----------------------------------------------------------------------------------------------------------|--------------|-------------------------------------------------------------------------------------------------------------------------------------------------------------------------------------------------------------------------------------------------------------------------------------------------------------------------------------------------|----------|
|  | <b>SNACK N.20</b>                                                                                        |              |                                                                                                                                                                                                                                                                                                                                                 |          |
|                                                                                   | Whole Rice (40 g/1.4 oz)<br>Beans <b>or</b> Chickpeas <b>or</b> Lentils<br>(200g/7.1 oz, Cooked Legumes) |              |                                                                                                                                                                                                                                                                                                                                                 |          |
|                                                                                   |                                                                                                          | <b>g</b>     | <b>Kcal</b>                                                                                                                                                                                                                                                                                                                                     | <b>%</b> |
|                                                                                   | Protein                                                                                                  | <b>11.60</b> | 46.40                                                                                                                                                                                                                                                                                                                                           | 17.10    |
|                                                                                   | Fat                                                                                                      | 3.50         | 31.50                                                                                                                                                                                                                                                                                                                                           | 11.50    |
|                                                                                   | Carbohydrates                                                                                            | <b>48.70</b> | 194.80                                                                                                                                                                                                                                                                                                                                          | 71.40    |
|                                                                                   | Total Energy                                                                                             |              | <b>272.70</b>                                                                                                                                                                                                                                                                                                                                   | 100.00   |
|                                                                                   | Sodium (mg)                                                                                              | 690          |     |          |

|                                                                                   |                                                   |              |                                                                                                                                                                                                                                                                                                                                                                                                                                     |          |
|-----------------------------------------------------------------------------------|---------------------------------------------------|--------------|-------------------------------------------------------------------------------------------------------------------------------------------------------------------------------------------------------------------------------------------------------------------------------------------------------------------------------------------------------------------------------------------------------------------------------------|----------|
|  | <b>SNACK N.21</b>                                 |              |                                                                                                                                                                                                                                                                                                                                                                                                                                     |          |
|                                                                                   | Whole Rice (40 g/1.4 oz)<br>Edamame (90 g/3.2 oz) |              |                                                                                                                                                                                                                                                                                                                                                                                                                                     |          |
|                                                                                   |                                                   | <b>g</b>     | <b>Kcal</b>                                                                                                                                                                                                                                                                                                                                                                                                                         | <b>%</b> |
|                                                                                   | Protein                                           | <b>12.60</b> | 50.40                                                                                                                                                                                                                                                                                                                                                                                                                               | 18.90    |
|                                                                                   | Fat                                               | 5.60         | 50.40                                                                                                                                                                                                                                                                                                                                                                                                                               | 18.90    |
|                                                                                   | Carbohydrates                                     | <b>41.50</b> | 166.00                                                                                                                                                                                                                                                                                                                                                                                                                              | 62.20    |
|                                                                                   | Total Energy                                      |              | <b>266.80</b>                                                                                                                                                                                                                                                                                                                                                                                                                       | 100.00   |
|                                                                                   | Sodium (mg)                                       | 10           |      |          |

|                                                                                     |                                                         |              |                                                                                                                                                                                                                                                                                                                                                         |          |
|-------------------------------------------------------------------------------------|---------------------------------------------------------|--------------|---------------------------------------------------------------------------------------------------------------------------------------------------------------------------------------------------------------------------------------------------------------------------------------------------------------------------------------------------------|----------|
|  | <b>SNACK N.22</b>                                       |              |                                                                                                                                                                                                                                                                                                                                                         |          |
|                                                                                     | Whole Rice (40 g/1.4 oz)<br>Smoked Salmon (50 g/1.8 oz) |              |                                                                                                                                                                                                                                                                                                                                                         |          |
|                                                                                     |                                                         | <b>g</b>     | <b>Kcal</b>                                                                                                                                                                                                                                                                                                                                             | <b>%</b> |
|                                                                                     | Protein                                                 | <b>15.40</b> | 61.60                                                                                                                                                                                                                                                                                                                                                   | 27.70    |
|                                                                                     | Fat                                                     | 3.40         | 30.60                                                                                                                                                                                                                                                                                                                                                   | 13.80    |
|                                                                                     | Carbohydrates                                           | <b>32.50</b> | 130.00                                                                                                                                                                                                                                                                                                                                                  | 58.50    |
|                                                                                     | Total Energy                                            |              | <b>222.20</b>                                                                                                                                                                                                                                                                                                                                           | 100.00   |
|                                                                                     | Sodium (mg)                                             | 940          |     |          |

|                                                                                     |                                                    |              |                                                                                                                                                                                                                                                                                                                                                         |          |
|-------------------------------------------------------------------------------------|----------------------------------------------------|--------------|---------------------------------------------------------------------------------------------------------------------------------------------------------------------------------------------------------------------------------------------------------------------------------------------------------------------------------------------------------|----------|
|  | <b>SNACK N.23</b>                                  |              |                                                                                                                                                                                                                                                                                                                                                         |          |
|                                                                                     | Whole Rice (40 g/1.4 oz)<br>Raw Tuna (50 g/1.8 oz) |              |                                                                                                                                                                                                                                                                                                                                                         |          |
|                                                                                     |                                                    | <b>g</b>     | <b>Kcal</b>                                                                                                                                                                                                                                                                                                                                             | <b>%</b> |
|                                                                                     | Protein                                            | <b>13.50</b> | 54.00                                                                                                                                                                                                                                                                                                                                                   | 23.40    |
|                                                                                     | Fat                                                | 5.20         | 46.80                                                                                                                                                                                                                                                                                                                                                   | 20.20    |
|                                                                                     | Carbohydrates                                      | <b>32.60</b> | 130.40                                                                                                                                                                                                                                                                                                                                                  | 56.40    |
|                                                                                     | Total Energy                                       |              | <b>231.20</b>                                                                                                                                                                                                                                                                                                                                           | 100.00   |
|                                                                                     | Sodium (mg)                                        | 23           |     |          |

|                                                                                     |                                                      |              |                                                                                                                                                                                                                                                                                                                                                         |          |
|-------------------------------------------------------------------------------------|------------------------------------------------------|--------------|---------------------------------------------------------------------------------------------------------------------------------------------------------------------------------------------------------------------------------------------------------------------------------------------------------------------------------------------------------|----------|
|  | <b>SNACK N.24</b>                                    |              |                                                                                                                                                                                                                                                                                                                                                         |          |
|                                                                                     | Whole Rice (40 g/1.4 oz)<br>Raw Salmon (50 g/1.8 oz) |              |                                                                                                                                                                                                                                                                                                                                                         |          |
|                                                                                     |                                                      | <b>g</b>     | <b>Kcal</b>                                                                                                                                                                                                                                                                                                                                             | <b>%</b> |
|                                                                                     | Protein                                              | <b>11.90</b> | 47.60                                                                                                                                                                                                                                                                                                                                                   | 19.60    |
|                                                                                     | Fat                                                  | 7.10         | 63.90                                                                                                                                                                                                                                                                                                                                                   | 26.20    |
|                                                                                     | Carbohydrates                                        | <b>33.00</b> | 132.00                                                                                                                                                                                                                                                                                                                                                  | 54.20    |
|                                                                                     | Total Energy                                         |              | <b>243.50</b>                                                                                                                                                                                                                                                                                                                                           | 100.00   |
|                                                                                     | Sodium (mg)                                          | 50           |     |          |

## PANCAKES

| SNACK N.25                                                                        |                              | g     | Kcal                                                                                                                                                                                                                                                        | %      |
|-----------------------------------------------------------------------------------|------------------------------|-------|-------------------------------------------------------------------------------------------------------------------------------------------------------------------------------------------------------------------------------------------------------------|--------|
|  | Egg White (100 ml/3.5 fl oz) | 15.70 | 62.60                                                                                                                                                                                                                                                       | 26.70  |
|                                                                                   | White Flour (45 g/1.6 oz)    | 0.30  | 2.80                                                                                                                                                                                                                                                        | 1.20   |
|                                                                                   | Sugar* (10 g/0.4 oz)         | 45.20 | 169.60                                                                                                                                                                                                                                                      | 72.10  |
|                                                                                   | Baking Powder (5 g/0.2 oz)   |       | <b>235.00</b>                                                                                                                                                                                                                                               | 100.00 |
|                                                                                   | *2 te spoons                 | 170   |    |        |
|                                                                                   |                              |       |                                                                                                                                                                                                                                                             |        |

| SNACK N.26                                                                        |                               | g            | Kcal                                                                                                                                                                    | %      |
|-----------------------------------------------------------------------------------|-------------------------------|--------------|-------------------------------------------------------------------------------------------------------------------------------------------------------------------------|--------|
|  | 1 Egg (60 g/2.1 oz)           | <b>14.70</b> | 58.80                                                                                                                                                                   | 23.00  |
|                                                                                   | White Flour (40 g/1.4 oz)     | 9.80         | 87.80                                                                                                                                                                   | 34.40  |
|                                                                                   | Whole Milk (120 ml/4.2 fl oz) | <b>29.00</b> | 108.90                                                                                                                                                                  | 42.60  |
|                                                                                   | Baking Powder * (5 g/0.2 oz)  |              | <b>255.50</b>                                                                                                                                                           | 100.00 |
|                                                                                   | *sugar free                   | 140          |   |        |
|                                                                                   |                               |              |                                                                                                                                                                         |        |

## MILKSHAKES

| SNACK N.27                                                                          |                                  | g            | Kcal                                                                                                                                                                                                                                                              | %      |
|-------------------------------------------------------------------------------------|----------------------------------|--------------|-------------------------------------------------------------------------------------------------------------------------------------------------------------------------------------------------------------------------------------------------------------------|--------|
|  | Milk 0.5% Fat (250 ml/8.8 fl oz) | <b>12.00</b> | 48.20                                                                                                                                                                                                                                                             | 19.20  |
|                                                                                     | Banana (150 g/5.3 oz)            | 2.10         | 19.20                                                                                                                                                                                                                                                             | 7.60   |
|                                                                                     | Biscuits (15 g/0.5 oz)           | <b>49.10</b> | 193.90                                                                                                                                                                                                                                                            | 73.20  |
|                                                                                     |                                  |              | <b>251.30</b>                                                                                                                                                                                                                                                     | 100.00 |
|                                                                                     |                                  | 180          |    |        |
|                                                                                     |                                  |              |                                                                                                                                                                                                                                                                   |        |

| SNACK N.28                                                                          |                                  | g            | Kcal                                                                                                                                                                                                                                                              | %      |
|-------------------------------------------------------------------------------------|----------------------------------|--------------|-------------------------------------------------------------------------------------------------------------------------------------------------------------------------------------------------------------------------------------------------------------------|--------|
|  | Milk 0.5% Fat (250 ml/8.8 fl oz) | <b>12.30</b> | 49.40                                                                                                                                                                                                                                                             | 18.90  |
|                                                                                     | Biscuits (15 g/0.5 oz)           | 8.50         | 76.80                                                                                                                                                                                                                                                             | 29.30  |
|                                                                                     | Vanilla Ice Cream (50 g/1.8)     | <b>36.20</b> | 135.60                                                                                                                                                                                                                                                            | 51.80  |
|                                                                                     |                                  |              | <b>260.60</b>                                                                                                                                                                                                                                                     | 100.00 |
|                                                                                     |                                  | 210          |    |        |
|                                                                                     |                                  |              |                                                                                                                                                                                                                                                                   |        |

| SNACK N.29                                                                          |                             | g            | Kcal                                                                                                                                                                                                                                                                                                                                                    | %      |
|-------------------------------------------------------------------------------------|-----------------------------|--------------|---------------------------------------------------------------------------------------------------------------------------------------------------------------------------------------------------------------------------------------------------------------------------------------------------------------------------------------------------------|--------|
|  | Soy Milk (250 ml/8.8 fl oz) | <b>11.90</b> | 47.40                                                                                                                                                                                                                                                                                                                                                   | 17.80  |
|                                                                                     | White Bread (60 g/2.1 oz)   | 5.00         | 45.20                                                                                                                                                                                                                                                                                                                                                   | 16.90  |
|                                                                                     |                             | <b>46.30</b> | 173.70                                                                                                                                                                                                                                                                                                                                                  | 65.30  |
|                                                                                     |                             |              | <b>266.30</b>                                                                                                                                                                                                                                                                                                                                           | 100.00 |
|                                                                                     |                             | 480          |     |        |
|                                                                                     |                             |              |                                                                                                                                                                                                                                                                                                                                                         |        |

## MILK BASED

| SNACK N.30                                                                        |                                  | g            | Kcal                                                                                                                                                                    | %      |
|-----------------------------------------------------------------------------------|----------------------------------|--------------|-------------------------------------------------------------------------------------------------------------------------------------------------------------------------|--------|
|  | Milk 2.5% Fat (250 ml/8.8 fl oz) |              |                                                                                                                                                                         |        |
|                                                                                   | Muesli (40 g/1.4 oz)             |              |                                                                                                                                                                         |        |
|                                                                                   | Protein                          | <b>12.20</b> | 48.90                                                                                                                                                                   | 18.80  |
|                                                                                   | Fat                              | 6.40         | 57.20                                                                                                                                                                   | 21.90  |
|                                                                                   | Carbohydrates                    | <b>41.20</b> | 154.50                                                                                                                                                                  | 59.30  |
|                                                                                   | Total Energy                     |              | <b>260.60</b>                                                                                                                                                           | 100.00 |
| Sodium (mg)                                                                       |                                  | 267          |   |        |

| SNACK N.31                                                                        |                                  | g            | Kcal                                                                                                                                                                                                                                                        | %      |
|-----------------------------------------------------------------------------------|----------------------------------|--------------|-------------------------------------------------------------------------------------------------------------------------------------------------------------------------------------------------------------------------------------------------------------|--------|
|  | Milk 2.5% Fat (250 ml/8.8 fl oz) |              |                                                                                                                                                                                                                                                             |        |
|                                                                                   | Oat Flakes (40 g/1.4 oz)         |              |                                                                                                                                                                                                                                                             |        |
|                                                                                   | Protein                          | <b>12.20</b> | 48.90                                                                                                                                                                                                                                                       | 20.30  |
|                                                                                   | Fat                              | 3.50         | 31.50                                                                                                                                                                                                                                                       | 13.10  |
|                                                                                   | Carbohydrates                    | <b>42.70</b> | 159.90                                                                                                                                                                                                                                                      | 66.60  |
|                                                                                   | Total Energy                     |              | <b>240.30</b>                                                                                                                                                                                                                                               | 100.00 |
| Sodium (mg)                                                                       |                                  | 130          |    |        |

| SNACK N.32                                                                         |                                  | g            | Kcal                                                                                                                                                                        | %      |
|------------------------------------------------------------------------------------|----------------------------------|--------------|-----------------------------------------------------------------------------------------------------------------------------------------------------------------------------|--------|
|  | Milk 0.5% Fat (250 ml/8.8 fl oz) |              |                                                                                                                                                                             |        |
|                                                                                    | Biscuits (40 g/1.4 oz)           |              |                                                                                                                                                                             |        |
|                                                                                    | Protein                          | <b>11.60</b> | 46.60                                                                                                                                                                       | 18.10  |
|                                                                                    | Fat                              | 3.70         | 32.90                                                                                                                                                                       | 12.80  |
|                                                                                    | Carbohydrates                    | <b>47.40</b> | 177.80                                                                                                                                                                      | 69.10  |
|                                                                                    | Total Energy                     |              | <b>257.30</b>                                                                                                                                                               | 100.00 |
| Sodium (mg)                                                                        |                                  | 294          |   |        |

| SNACK N.33                                                                          |                                  | g            | Kcal                                                                                                                                                                                                                                                              | %      |
|-------------------------------------------------------------------------------------|----------------------------------|--------------|-------------------------------------------------------------------------------------------------------------------------------------------------------------------------------------------------------------------------------------------------------------------|--------|
|  | Milk 2.5% Fat (250 ml/8.8 fl oz) |              |                                                                                                                                                                                                                                                                   |        |
|                                                                                     | 2 Weetabix (37 g/1.3 oz)         |              |                                                                                                                                                                                                                                                                   |        |
|                                                                                     | Protein                          | <b>12.70</b> | 50.80                                                                                                                                                                                                                                                             | 21.00  |
|                                                                                     | Fat                              | 4.50         | 40.40                                                                                                                                                                                                                                                             | 16.70  |
|                                                                                     | Carbohydrates                    | <b>40.20</b> | 150.80                                                                                                                                                                                                                                                            | 62.30  |
|                                                                                     | Total Energy                     |              | <b>242.00</b>                                                                                                                                                                                                                                                     | 100.00 |
| Sodium (mg)                                                                         |                                  | 215          |    |        |

| SNACK N.34                                                                          |                                  | g            | Kcal                                                                                                                                                                                                                                                              | %      |
|-------------------------------------------------------------------------------------|----------------------------------|--------------|-------------------------------------------------------------------------------------------------------------------------------------------------------------------------------------------------------------------------------------------------------------------|--------|
|  | Milk 2.5% Fat (250 ml/8.8 fl oz) |              |                                                                                                                                                                                                                                                                   |        |
|                                                                                     | Semolina Flour (30 g/1.1 oz)     |              |                                                                                                                                                                                                                                                                   |        |
|                                                                                     | Protein                          | <b>11.50</b> | 45.80                                                                                                                                                                                                                                                             | 20.90  |
|                                                                                     | Fat                              | 4.20         | 37.30                                                                                                                                                                                                                                                             | 17.20  |
|                                                                                     | Carbohydrates                    | <b>36.00</b> | 135.10                                                                                                                                                                                                                                                            | 61.90  |
|                                                                                     | Total Energy                     |              | <b>218.20</b>                                                                                                                                                                                                                                                     | 100.00 |
| Sodium (mg)                                                                         |                                  | 119          |    |        |

| SNACK N.35                                                                          |                                   | g            | Kcal                                                                                                                                                                                                                                                                                                                                                    | %      |
|-------------------------------------------------------------------------------------|-----------------------------------|--------------|---------------------------------------------------------------------------------------------------------------------------------------------------------------------------------------------------------------------------------------------------------------------------------------------------------------------------------------------------------|--------|
|  | Milk 0.5% Fat (300 ml/10.6 fl oz) |              |                                                                                                                                                                                                                                                                                                                                                         |        |
|                                                                                     | White rice (40 g/1.4 oz)          |              |                                                                                                                                                                                                                                                                                                                                                         |        |
|                                                                                     | Protein                           | <b>13.90</b> | 53.60                                                                                                                                                                                                                                                                                                                                                   | 22.00  |
|                                                                                     | Fat                               | 0.80         | 7.60                                                                                                                                                                                                                                                                                                                                                    | 3.00   |
|                                                                                     | Carbohydrates                     | <b>50.60</b> | 189.90                                                                                                                                                                                                                                                                                                                                                  | 75.00  |
|                                                                                     | Total Energy                      |              | <b>251.10</b>                                                                                                                                                                                                                                                                                                                                           | 100.00 |
| Sodium (mg)                                                                         |                                   | 160          |     |        |



|                                                                                                                                                                     |               |              |                                                                                                                                                                                                                                                                                                                                                 |          |
|---------------------------------------------------------------------------------------------------------------------------------------------------------------------|---------------|--------------|-------------------------------------------------------------------------------------------------------------------------------------------------------------------------------------------------------------------------------------------------------------------------------------------------------------------------------------------------|----------|
|  <b>SNACK N.36</b><br>Milk 2.5% Fat (250 ml/8.8 fl oz)<br>Rice Flour (30 g/1.1 oz) |               | <b>g</b>     | <b>Kcal</b>                                                                                                                                                                                                                                                                                                                                     | <b>%</b> |
|                                                                                                                                                                     | Protein       | <b>10.20</b> | 40.80                                                                                                                                                                                                                                                                                                                                           | 18.10    |
|                                                                                                                                                                     | Fat           | 4.20         | 37.40                                                                                                                                                                                                                                                                                                                                           | 16.60    |
|                                                                                                                                                                     | Carbohydrates | <b>39.10</b> | 146.60                                                                                                                                                                                                                                                                                                                                          | 65.30    |
|                                                                                                                                                                     | Total Energy  |              | <b>224.80</b>                                                                                                                                                                                                                                                                                                                                   | 100.00   |
|                                                                                                                                                                     | Sodium (mg)   | 117          |     |          |

|                                                                                                                                                                      |               |              |                                                                                                                                                                                                                                                                                                                                                                                                                                     |          |
|----------------------------------------------------------------------------------------------------------------------------------------------------------------------|---------------|--------------|-------------------------------------------------------------------------------------------------------------------------------------------------------------------------------------------------------------------------------------------------------------------------------------------------------------------------------------------------------------------------------------------------------------------------------------|----------|
|  <b>SNACK N.37</b><br>Milk 0.5% Fat (300 ml/10.6 fl oz)<br>Whole Rice (40 g/1.4 oz) |               | <b>g</b>     | <b>Kcal</b>                                                                                                                                                                                                                                                                                                                                                                                                                         | <b>%</b> |
|                                                                                                                                                                      | Protein       | <b>13.80</b> | 55.20                                                                                                                                                                                                                                                                                                                                                                                                                               | 21.00    |
|                                                                                                                                                                      | Fat           | 1.70         | 15.30                                                                                                                                                                                                                                                                                                                                                                                                                               | 5.80     |
|                                                                                                                                                                      | Carbohydrates | <b>48.10</b> | 192.40                                                                                                                                                                                                                                                                                                                                                                                                                              | 73.20    |
|                                                                                                                                                                      | Total Energy  |              | <b>262.90</b>                                                                                                                                                                                                                                                                                                                                                                                                                       | 100.00   |
|                                                                                                                                                                      | Sodium (mg)   | 150          |      |          |

## YOGURT BASED

|                                                                                                                                                                      |               |              |                                                                                       |          |
|----------------------------------------------------------------------------------------------------------------------------------------------------------------------|---------------|--------------|---------------------------------------------------------------------------------------|----------|
|  <b>SNACK N.38</b><br>White Fat Free Yogurt (250 g/8.8 oz)<br>Muesli (40 g/1.4 oz) |               | <b>g</b>     | <b>Kcal</b>                                                                           | <b>%</b> |
|                                                                                                                                                                      | Protein       | <b>12.50</b> | 49.90                                                                                 | 21.20    |
|                                                                                                                                                                      | Fat           | 4.60         | 41.50                                                                                 | 17.60    |
|                                                                                                                                                                      | Carbohydrates | <b>38.40</b> | 144.20                                                                                | 61.20    |
|                                                                                                                                                                      | Total Energy  |              | <b>235.60</b>                                                                         | 100.00   |
|                                                                                                                                                                      | Sodium (mg)   | 297          |  |          |

|                                                                                                                                                                         |               |              |                                                                                                                                                                                                                                                                   |          |
|-------------------------------------------------------------------------------------------------------------------------------------------------------------------------|---------------|--------------|-------------------------------------------------------------------------------------------------------------------------------------------------------------------------------------------------------------------------------------------------------------------|----------|
|  <b>SNACK N.39</b><br>Greek Yogurt 5% Fat (100 g/3.5 oz)<br>2 Weetabix (37 g/1.3 oz) |               | <b>g</b>     | <b>Kcal</b>                                                                                                                                                                                                                                                       | <b>%</b> |
|                                                                                                                                                                         | Protein       | <b>13.00</b> | 51.80                                                                                                                                                                                                                                                             | 23.70    |
|                                                                                                                                                                         | Fat           | 5.70         | 51.70                                                                                                                                                                                                                                                             | 23.60    |
|                                                                                                                                                                         | Carbohydrates | <b>30.70</b> | 115.20                                                                                                                                                                                                                                                            | 52.70    |
|                                                                                                                                                                         | Total Energy  |              | <b>218.70</b>                                                                                                                                                                                                                                                     | 100.00   |
|                                                                                                                                                                         | Sodium (mg)   | 171          |    |          |

## OTHERS

|                                                                                                                                                                                                                 |               |              |               |          |
|-----------------------------------------------------------------------------------------------------------------------------------------------------------------------------------------------------------------|---------------|--------------|---------------|----------|
|  <b>SNACK N.40</b><br>Margherita Pizza* (80 g/2.8 oz)<br>Ham** (30 g/1.1 oz)<br>*Tomatoes + Mozzarella Cheese<br>** 2 slices |               | <b>g</b>     | <b>Kcal</b>   | <b>%</b> |
|                                                                                                                                                                                                                 | Protein       | <b>11.10</b> | 44.60         | 17.40    |
|                                                                                                                                                                                                                 | Fat           | 5.80         | 52.20         | 20.30    |
|                                                                                                                                                                                                                 | Carbohydrates | <b>42.60</b> | 159.80        | 62.30    |
|                                                                                                                                                                                                                 | Total Energy  |              | <b>256.60</b> | 100.00   |
|                                                                                                                                                                                                                 | Sodium (mg)   | 1005         |               |          |

|                                                                                                                                                                                             |               |              |                                                                                     |          |
|---------------------------------------------------------------------------------------------------------------------------------------------------------------------------------------------|---------------|--------------|-------------------------------------------------------------------------------------|----------|
|  <b>SNACK N.41</b><br><br>Tortillas (50 g/1.8 oz)<br>Cooked Beans (150 g/5.3 oz)<br>Emmental (20 g/0.7 oz) |               | <b>g</b>     | <b>Kcal</b>                                                                         | <b>%</b> |
|                                                                                                                                                                                             | Protein       | <b>14.70</b> | 58.80                                                                               | 23.10    |
|                                                                                                                                                                                             | Fat           | 8.30         | 74.70                                                                               | 29.20    |
|                                                                                                                                                                                             | Carbohydrates | <b>32.50</b> | 121.80                                                                              | 47.70    |
|                                                                                                                                                                                             | Total Energy  |              | <b>255.30</b>                                                                       | 100.00   |
|                                                                                                                                                                                             | Sodium (mg)   | 570          |  |          |

|                                                                                                                                                           |               |              |                                                                                                                                                                                                                                                             |          |
|-----------------------------------------------------------------------------------------------------------------------------------------------------------|---------------|--------------|-------------------------------------------------------------------------------------------------------------------------------------------------------------------------------------------------------------------------------------------------------------|----------|
|  <b>SNACK N.42</b><br><br>Soy noodle (40 g/1.4 oz)<br>Meat (60 g/2.1 oz) |               | <b>g</b>     | <b>Kcal</b>                                                                                                                                                                                                                                                 | <b>%</b> |
|                                                                                                                                                           | Protein       | <b>12.00</b> | 47.90                                                                                                                                                                                                                                                       | 20.10    |
|                                                                                                                                                           | Fat           | 4.10         | 37.20                                                                                                                                                                                                                                                       | 15.60    |
|                                                                                                                                                           | Carbohydrates | <b>41.00</b> | 153.80                                                                                                                                                                                                                                                      | 64.30    |
|                                                                                                                                                           | Total Energy  |              | <b>238.90</b>                                                                                                                                                                                                                                               | 100.00   |
|                                                                                                                                                           | Sodium (mg)   | 35           |    |          |

|                                                                                                                                                        |               |              |                                                                                                                                                                                                                                                                                                                                                     |          |
|--------------------------------------------------------------------------------------------------------------------------------------------------------|---------------|--------------|-----------------------------------------------------------------------------------------------------------------------------------------------------------------------------------------------------------------------------------------------------------------------------------------------------------------------------------------------------|----------|
|  <b>SNACK N.43</b><br><br>Arepa (80 g/2.8 oz)<br>1 Egg (60 g/2.1 oz) |               | <b>g</b>     | <b>Kcal</b>                                                                                                                                                                                                                                                                                                                                         | <b>%</b> |
|                                                                                                                                                        | Protein       | <b>11.40</b> | 45.80                                                                                                                                                                                                                                                                                                                                               | 19.10    |
|                                                                                                                                                        | Fat           | 9.20         | 82.90                                                                                                                                                                                                                                                                                                                                               | 34.60    |
|                                                                                                                                                        | Carbohydrates | <b>29.60</b> | 111.00                                                                                                                                                                                                                                                                                                                                              | 46.30    |
|                                                                                                                                                        | Total Energy  |              | <b>239.70</b>                                                                                                                                                                                                                                                                                                                                       | 100.00   |
|                                                                                                                                                        | Sodium (mg)   | 130          |     |          |

## LEGEND:

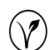

*Vegan*

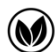

*Lacto-Ovo-Vegetarian*

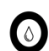

*Diabetes*

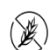

*Gluten Free*

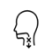

*Dysphagia*

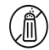

*Low Sodium (< 276 mg / 12 mEq Na)*

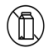

*Lactose Free*
